# Supplementary material for: Atomically precise Ag 25 (SR) 18 nanoclusters: a stable photosensitizer for photocatalysis
Source: Royal Society of Chemistry journal article supplement (doi:10.1039/d4qi01976h), 2024-01-01
Supplement: d4qi01976h1.pdf [file d4qi01976h1.pdf]

# Supporting Information

## Atomically Precise Ag<sub>25</sub>(SR)<sub>18</sub> Nanoclusters: A Stable Photosensitizers for Photocatalysis

Linjian Zhan,<sup>a</sup> Junyi Zhang,<sup>a</sup> Boyuan Ning,<sup>a</sup> Yunhui He,<sup>a,b\*</sup> Guangcan Xiao,<sup>a,b</sup> Zhixin Chen,<sup>a,b</sup> Fang-Xing  
Xiao<sup>a,c\*</sup>

a. School of Advanced Manufacturing, Fuzhou University, Jinjiang, 362200, PR China.

b. Instrumental Measurement and Analysis Center, Fuzhou University, Fuzhou 350108, PR China

c. College of Materials Science and Engineering, Fuzhou University, Fuzhou 350108, PR China.

Email: [hyh@fzu.edu.cn](mailto:hyh@fzu.edu.cn)

[fxxiao@fzu.edu.cn](mailto:fxxiao@fzu.edu.cn)

## Table of Content

|                                                                                                                                                                           | Page NO. |
|---------------------------------------------------------------------------------------------------------------------------------------------------------------------------|----------|
| Experimental Details.....                                                                                                                                                 | S3       |
| Figure S1. UV-vis absorption spectra of $\text{Ag}_{25}(\text{SR})_{18}$ NCs.....                                                                                         | S4       |
| Figure S2. FESEM images of CdS and $\text{CdS}/\text{Ag}_{25}(\text{SR})_{18}$ heterostructure.....                                                                       | S5       |
| Figure S4. TEM and HRTEM images of CdS and $\text{CdS}/\text{Ag}_{25}(\text{SR})_{18}$ heterostructure.....                                                               | S6       |
| Figure S3. EDS and element mapping results of CdS and $\text{CdS}/\text{Ag}_{25}(\text{SR})_{18}$ heterostructure.....                                                    | S7       |
| Figure S5. Sample colors of CdS and $\text{CdS}/\text{Ag}_{25}(\text{SR})_{18}$ heterostructure.....                                                                      | S8       |
| Figure S6. EDS result of $\text{CdS}/\text{Ag}_{25}(\text{SR})_{18}$ heterostructure.....                                                                                 | S9       |
| Figure S7. Nitrogen adsorption-desorption isotherms CdS NWs and $\text{CdS}/\text{Ag}_{25}(\text{SR})_{18}$ heterostructure.....                                          | S10      |
| Figure S8. UV-vis absorption spectra of 4-NA photoreduction.....                                                                                                          | S11      |
| Figure S9. Blank experiment for photocatalytic reduction of 4-NA.....                                                                                                     | S12      |
| Figure S10. Xrd patterns spectra of CdS NWs and $\text{CdS}/\text{Ag}_{25}(\text{SR})_{18}$ heterostructure cyclic experiment.....                                        | S13      |
| Figure S11. PL spectra of CdS NWs and $\text{CdS}/\text{Ag}_{25}(\text{SR})_{18}$ heterostructure with an excitation wavelength of 350 nm.....                            | S14      |
| Figure S12. Mott-Schottky plots of CdS and $\text{CdS}/\text{Ag}_{25}(\text{SR})_{18}$ heterostructure.....                                                               | S15      |
| Table S1. Peak position of FT-IR with corresponding functional groups.....                                                                                                | S16      |
| Table S2. Chemical bond species for CdS NWs and $\text{CdS}/\text{Ag}_{25}(\text{SR})_{18}$ heterostructure.....                                                          | S17      |
| Table S3. Specific surface area, pore volume and pore size of CdS NWs and $\text{CdS}/\text{Ag}_{25}(\text{SR})_{18}$ heterostructure.....                                | S18      |
| Table S4. Photoactivities of $\text{CdS}/\text{Ag}_{25}(\text{SR})_{18}$ heterostructure toward reduction of aromatic nitro compounds and Cr(VI) under visible light..... | S20      |
| Table S5. Relative element percentage of $\text{CdS}/\text{Ag}_{25}(\text{SR})_{18}$ heterostructure.....                                                                 | S21      |
| Referances.....                                                                                                                                                           | S22      |

## Experimental Details

### Materials

Cadmium acetate, ethylenediamine,  $\text{CH}_4\text{N}_2\text{S}$ ,  $\text{CHCl}_2$ ,  $\text{NaBH}_4$ ,  $\text{AgNO}_3$ , distilled water, 2,4-dimethylbenzenethiol,  $\text{PPh}_4\text{Br}$ , methanol, 4-nitroaniline (4-NA), 3-nitroaniline (3-NA), 2-nitroaniline (2-NA), 4-nitrophenol (4-NP), 3-nitrophenol (3-NP), 2-nitrophenol (2-NP), 1-bromo-4-nitrobenzene, 1-chloro-4-nitrobenzene, 4-nitroanisole, 4-nitrotoluene (4-NT), nitrobenzene (NB), o-nitroacetophenone.

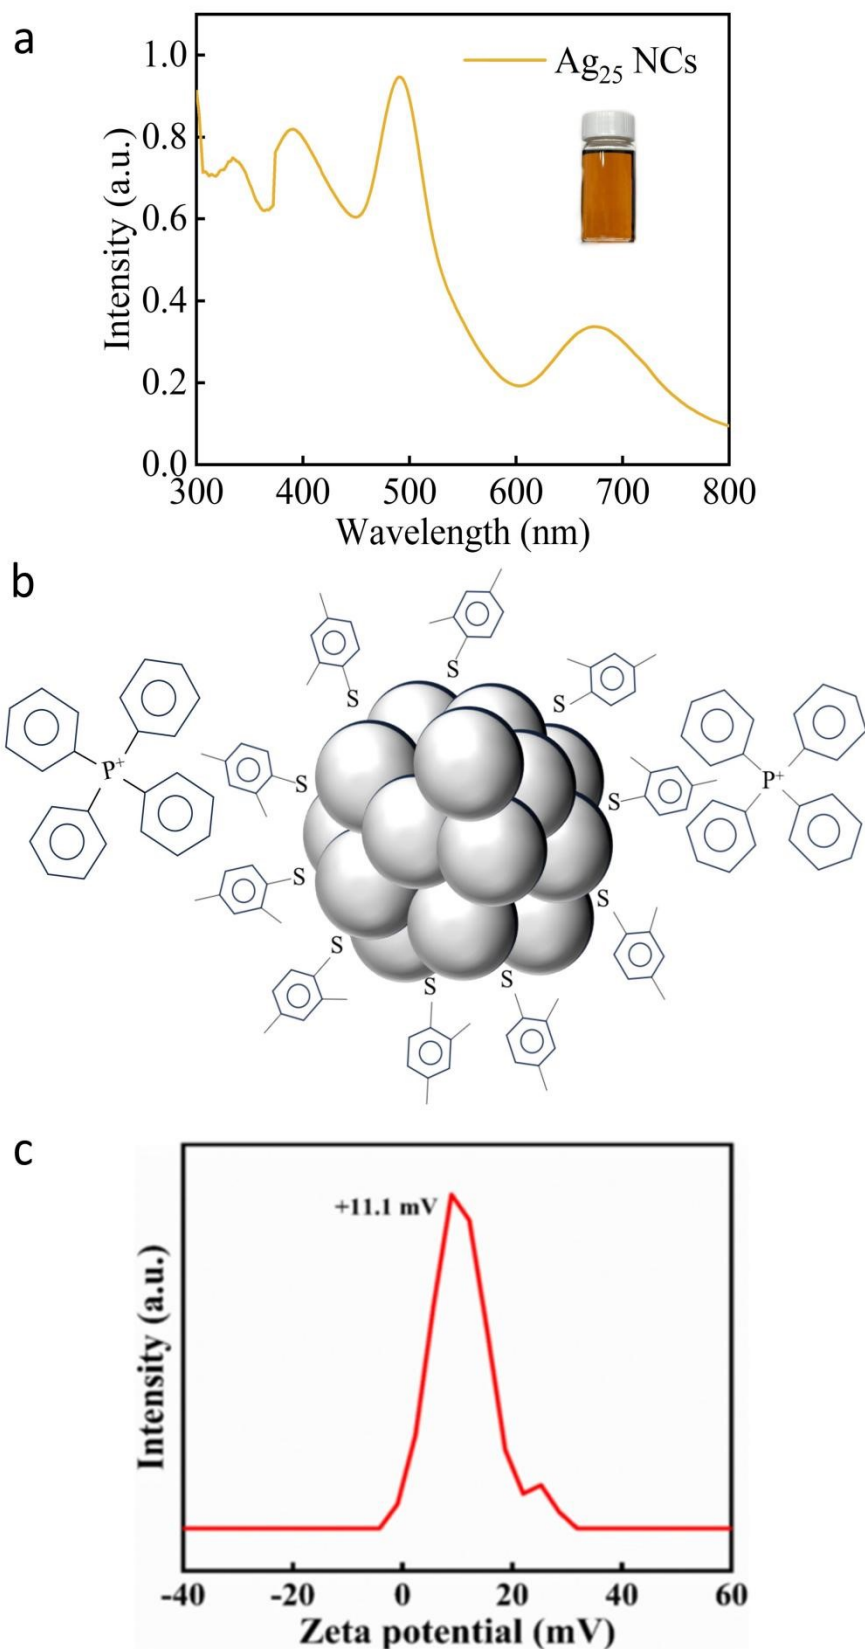

**Fig. S1.**(a) UV-vis absorption spectra of Ag<sub>25</sub>(SR)<sub>18</sub> NCs and (b) schematic model illustrating the molecule structure of Ag<sub>25</sub>(SR)<sub>18</sub> NCs and surface SR ligand, (c) Zeta potential of CdS NWs[1].

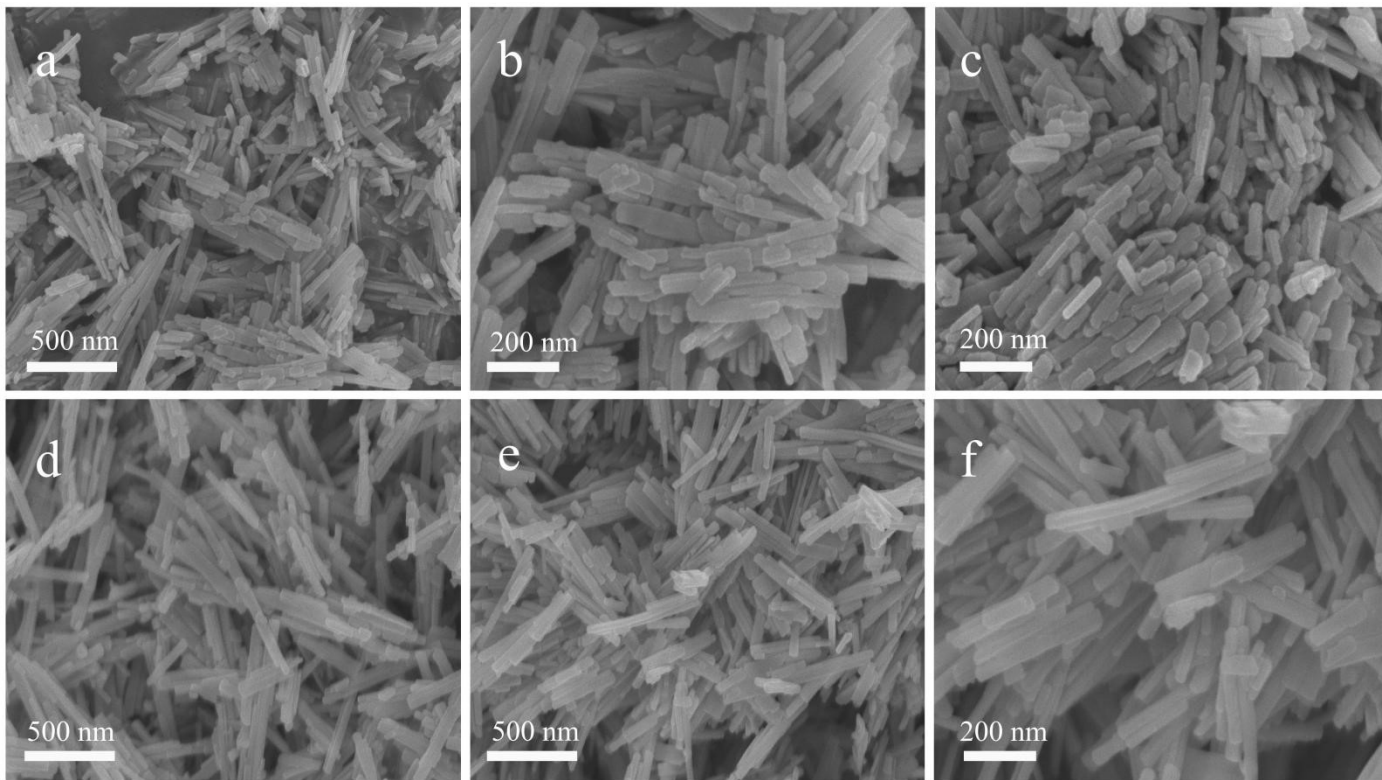

**Fig. S2.** FESEM images of (a-c) CdS NWs and (d-f) CdS/Ag<sub>25</sub>(SR)<sub>18</sub> heterostructure.

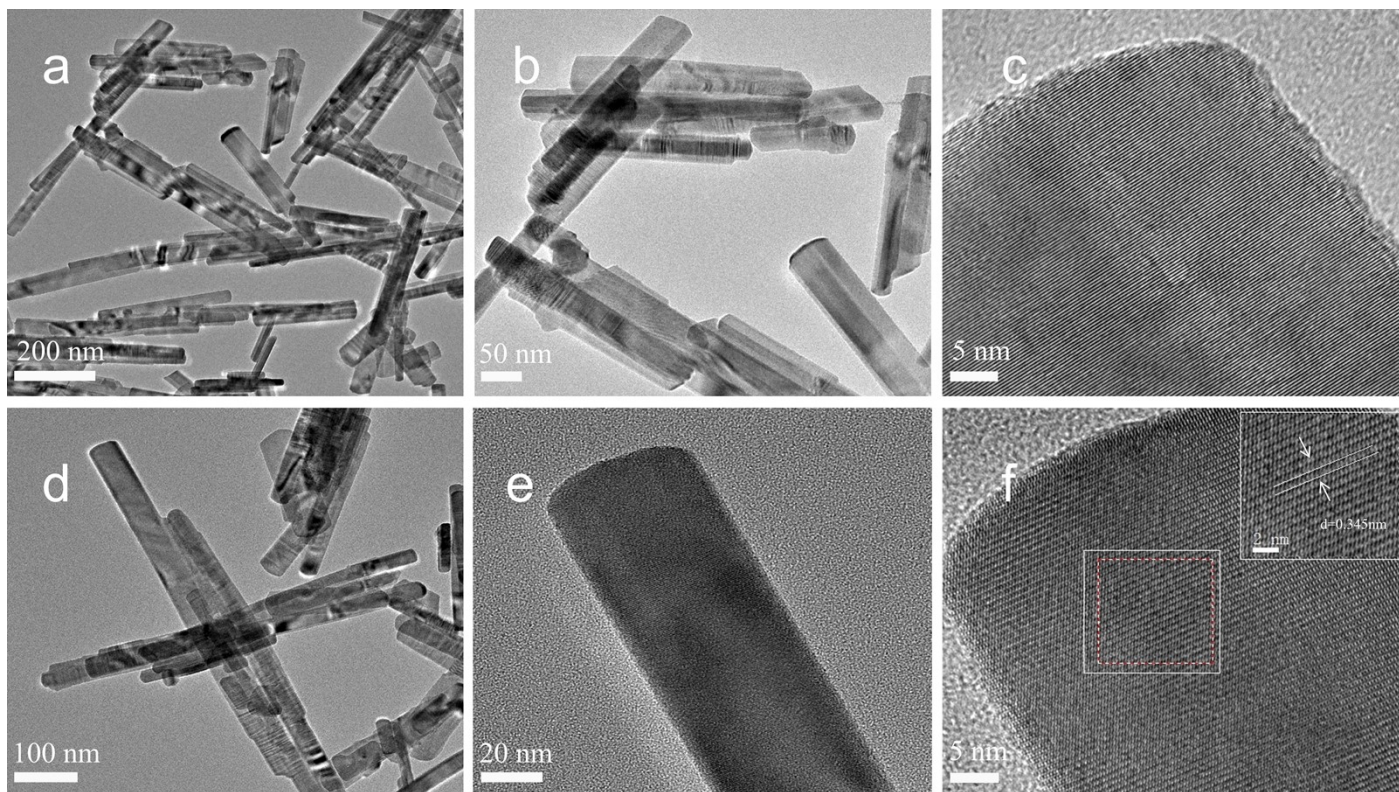

**Fig. S3.** TEM and HRTEM images of (a-c) CdS NWs and (d-f) CdS/Ag<sub>25</sub>(SR)<sub>18</sub> heterostructure.

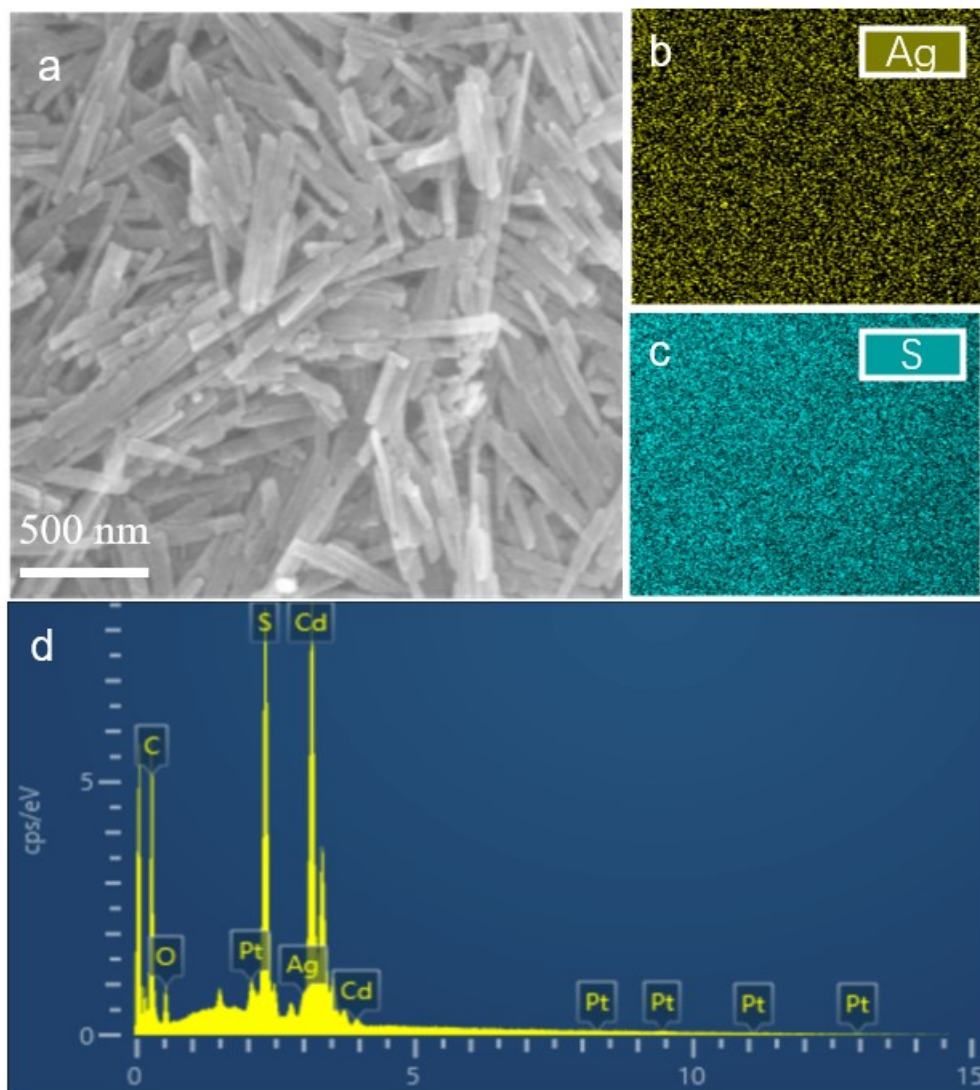

**Fig. S4.** (a) SEM image and (b-c) elemental mapping and (d) EDS results of CdS/Ag<sub>25</sub>(SR)<sub>18</sub> heterostructure.

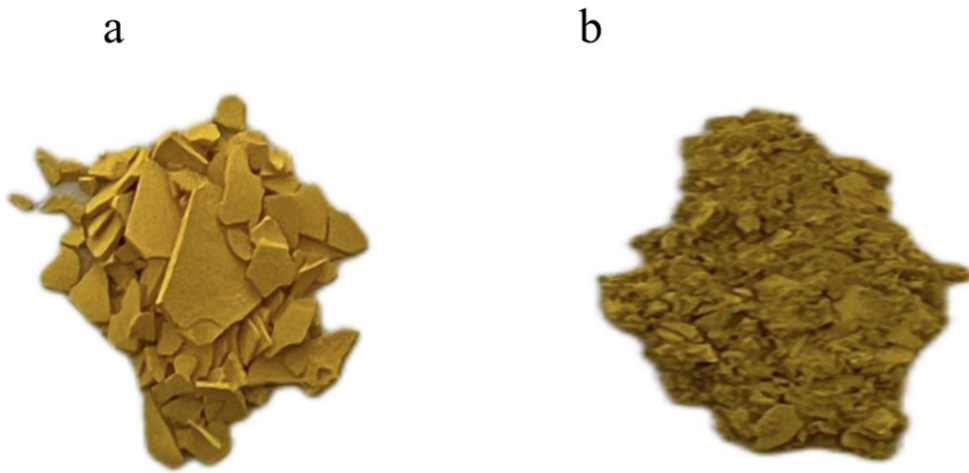

**Fig. S5.** Sample colors of (a) CdS NWs and (b) CdS/Ag<sub>25</sub>(SR)<sub>18</sub> heterostructure.



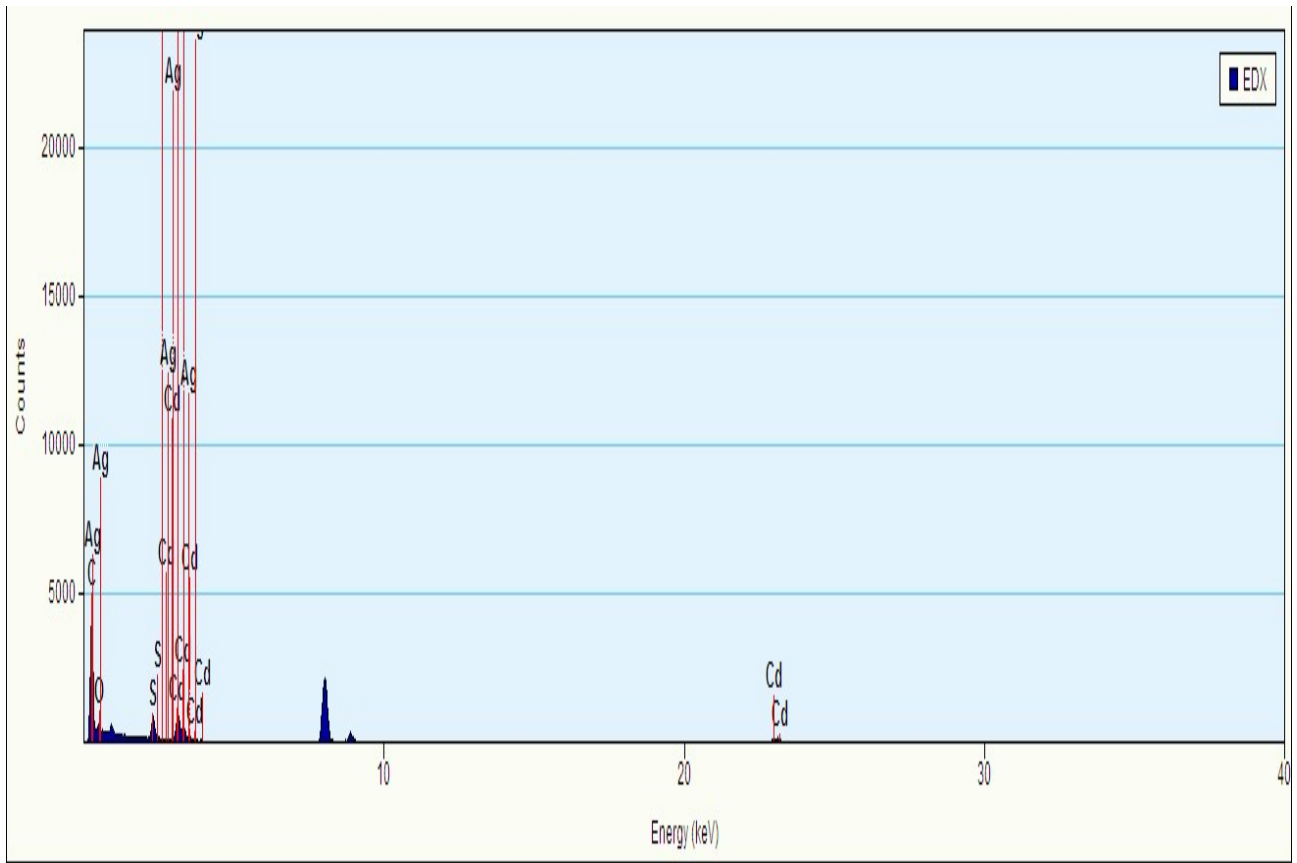

**Fig. S6.** EDS result of CdS/Ag<sub>25</sub>(SR)<sub>18</sub> heterostructure.

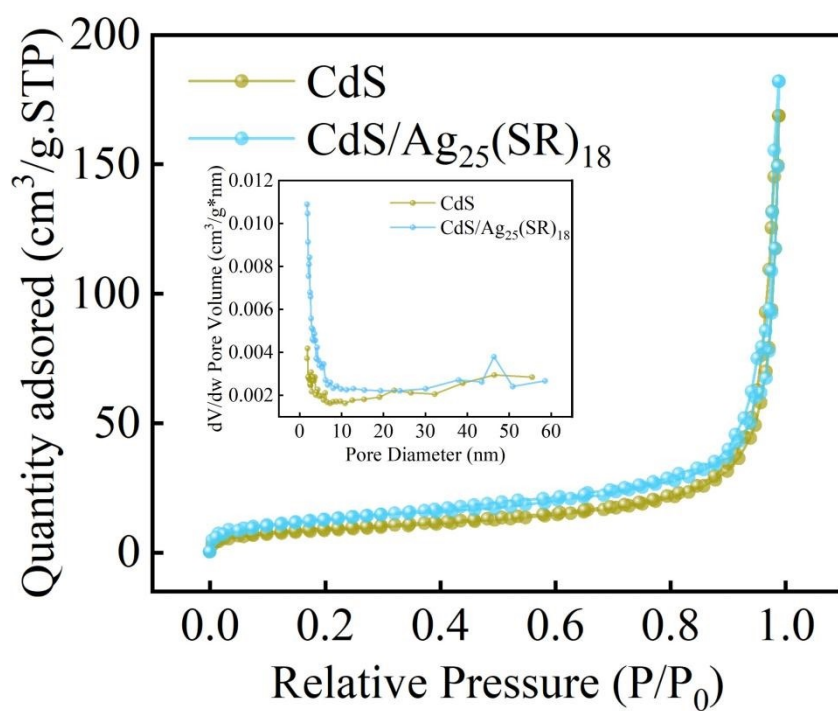

**Fig. S7.** Nitrogen adsorption-desorption isotherms of CdS NW and CdS/Ag<sub>25</sub>(SR)<sub>18</sub> heterostructure with pore size distribution patterns in the inset.

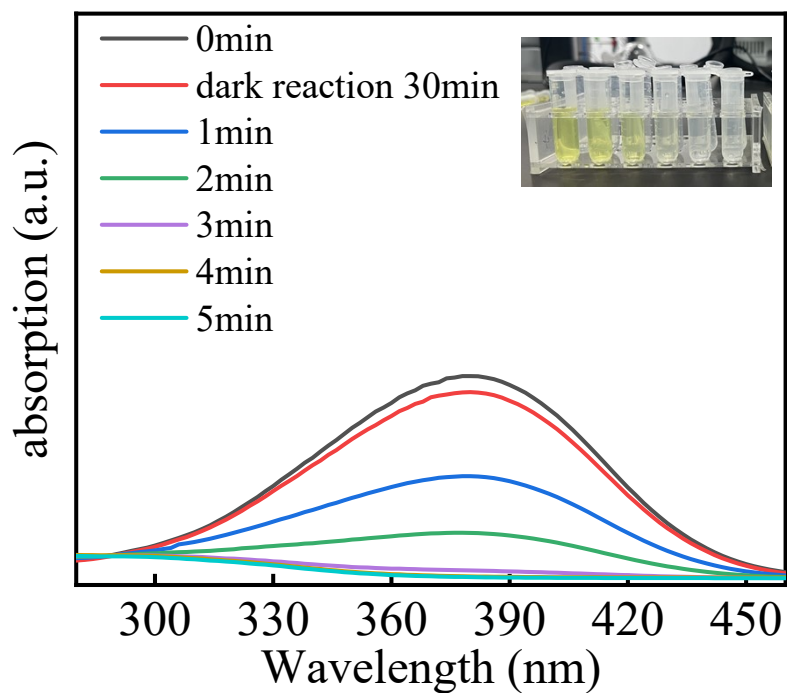

**Fig. S8.** UV-vis absorption spectra of 4-NA collected after designated irradiation time (1 min) when it was photoreduced over CdS/Ag<sub>25</sub>(SR)<sub>18</sub> heterostructure under visible light irradiation ( $\lambda > 420$  nm) with the addition of sodium sulfite as hole quencher and N<sub>2</sub> purge under ambient conditions.

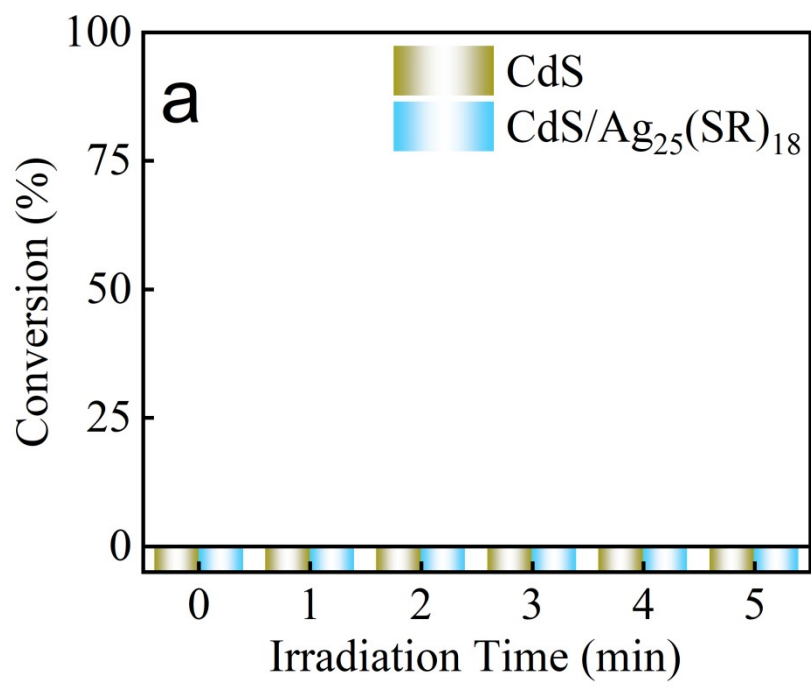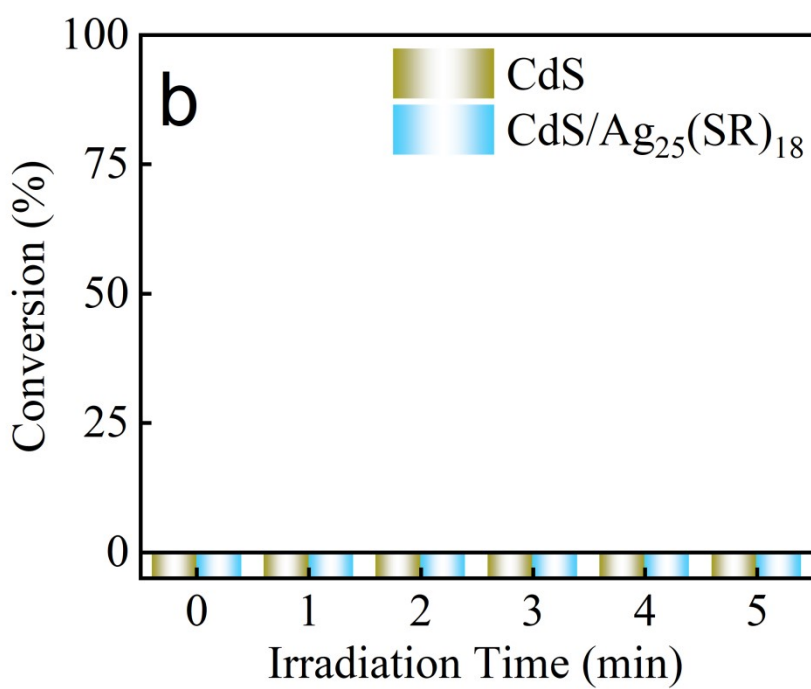

**Fig. S9.** Blank experiment for photocatalytic reduction of 4-NA (a) without light or (b) catalyst.

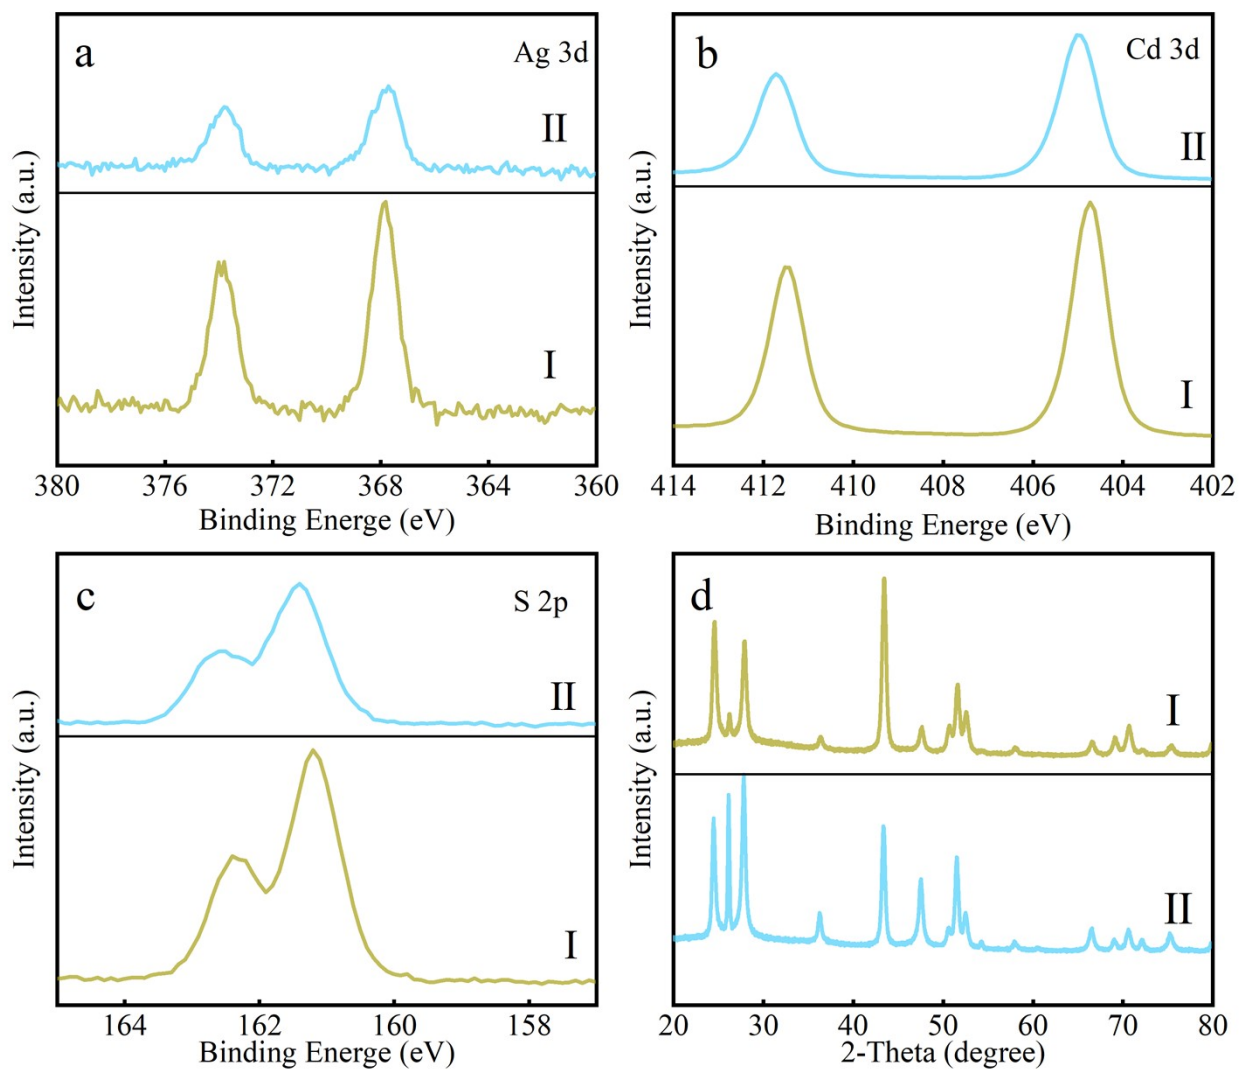

**Fig. S10.** High-resolution (a) Ag 3d (b)Cd 3d, and (c) S 2p spectra, and (d) XRD patterns spectra of CdS NWs and CdS/Ag<sub>25</sub>(SR)<sub>18</sub> heterostructure (I) before and (II) after cyclic 4-NA photoreduction reactions.

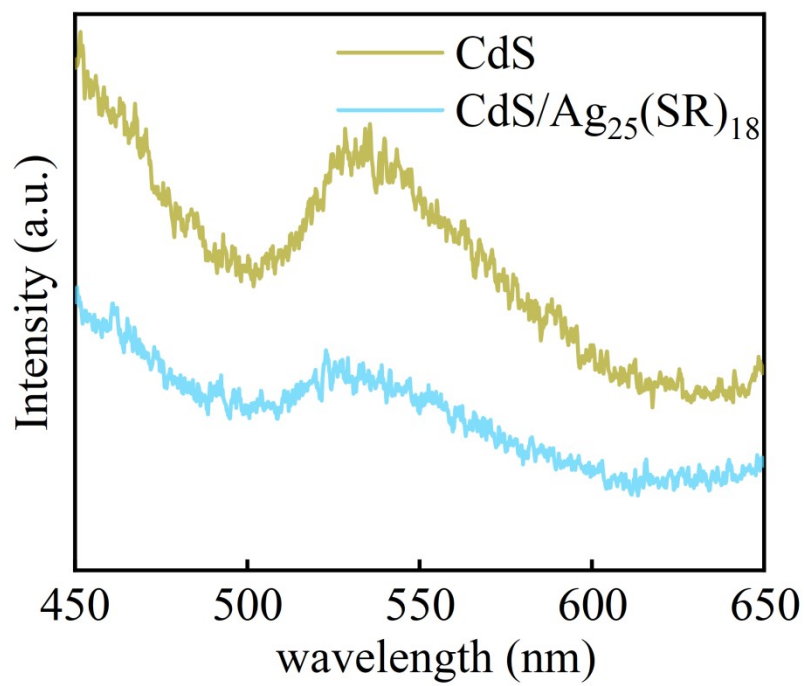

**Fig. S11.** PL spectra of CdS NWs and CdS/Ag<sub>25</sub>(SR)<sub>18</sub> heterostructure with an excitation wavelength of 350 nm

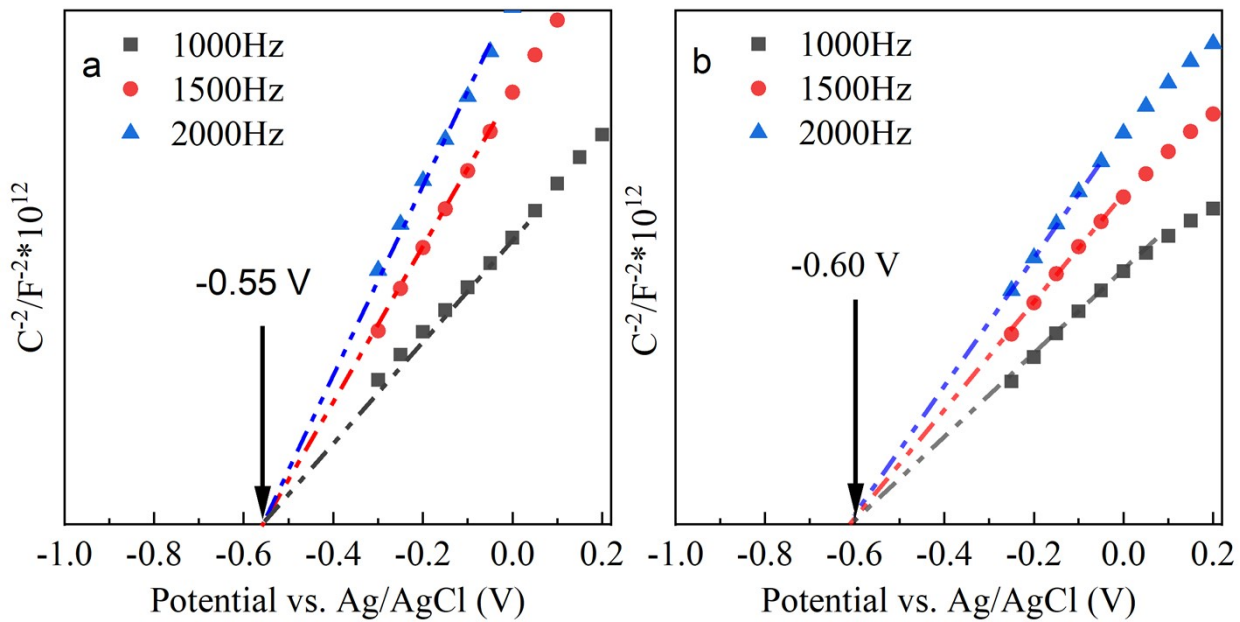

**Fig. S12.** Mote-Schittky (M-S) plots of (a) CdS NWs and (b) CdS/Ag<sub>25</sub>(SR)<sub>18</sub> heterostructure.

**Table S1.** Peak position of FT-IR with corresponding functional groups.

| <i>Peak position (cm<sup>-1</sup>)</i> | <i>Vibration mode</i>      |
|----------------------------------------|----------------------------|
| 3374                                   | -NH <sub>2</sub> , -OH [2] |
| 2935&2850                              | -CH <sub>2</sub> [2]       |
| 1635                                   | -NH <sub>2</sub> [2]       |
| 1380                                   | -CH <sub>3</sub> [2]       |
| 1061                                   | -C-N- [2]                  |



**Table S2.** Chemical bond species for CdS NWs and CdS/Ag<sub>25</sub>(SR)<sub>18</sub> heterostructure.

| <i>Elements</i>      | <i>CdS</i> | <i>CdS/Ag<sub>25</sub>(SR)<sub>18</sub></i> | <i>Chemical Bond Species</i> |
|----------------------|------------|---------------------------------------------|------------------------------|
| Cd 3d <sub>5/2</sub> | 404.82     | 405.10                                      | Cd <sup>2+</sup> [3]         |
| Cd 3d <sub>5/2</sub> | 411.53     | 411.88                                      | Cd <sup>2+</sup> [3]         |
| S 2p <sub>3/2</sub>  | 161.28     | 161.61                                      | S <sup>2-</sup> [4]          |
| S 2p <sub>1/2</sub>  | 162.46     | 162.80                                      | S <sup>2-</sup> [4]          |
| Ag 3d <sub>5/2</sub> | N.D.       | 368.6                                       | Ag <sup>0</sup> [5; 6]       |
| Ag 3d <sub>3/2</sub> | N.D.       | 374.6                                       | Ag <sup>0</sup> [5; 6]       |
| Ag 3d <sub>5/2</sub> | N.D.       | 368                                         | Ag <sup>+</sup> [5; 6]       |
| Ag 3d <sub>3/2</sub> | N.D.       | 374.05                                      | Ag <sup>+</sup> [5; 6]       |

N.D.: Not detected

**Table S3.** Specific surface area, pore volume and pore size of CdS NWs, CdS/Ag<sub>25</sub>(SR)<sub>18</sub> heterostructure.

| <i>Samples</i>                          | <i>SBET (m<sup>2</sup>/g)<sup>a</sup></i> | <i>Total pore volume (cm<sup>3</sup>/g)<sup>b</sup></i> | <i>Average pore size (nm)</i> |
|-----------------------------------------|-------------------------------------------|---------------------------------------------------------|-------------------------------|
| CdS NWs                                 | 30.1736                                   | 0.2597                                                  | 34.4274                       |
| CdS/Ag <sub>25</sub> (SR) <sub>18</sub> | 44.6490                                   | 0.2783                                                  | 24.9322                       |

<sup>a</sup> BET surface area is calculated from the linear part of BET plots.

<sup>b</sup> Single point total pore volume of the pores at P/P<sub>0</sub>=0.99.

<sup>c</sup> Adsorption average pore width (4V/A by BET)

**Table S4.** Photoactivities of CdS/12%Ag<sub>25</sub>(SR)<sub>18</sub> heterostructure toward reduction of nitro compound and Cr<sup>6+</sup> under visible light irradiation ( $\lambda > 420$  nm).

| <i>Number</i> | <i>Substrate</i>                                                                    | <i>CdS</i>     | <i>CdS/Ag<sub>25</sub>(SR)<sub>18</sub></i> |
|---------------|-------------------------------------------------------------------------------------|----------------|---------------------------------------------|
| a             | 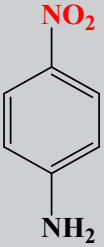   | 37.59% (5 min) | 99.7% (5 min)                               |
| b             |    | 42.09% (1 min) | 74.38% (1 min)                              |
| c             |   | 58.17% (5 min) | 95.3% (5 min)                               |
| d             |  | 62.48% (5 min) | 86.55% (5 min)                              |
| e             |  | 26.03% (2 min) | 45.74% (2 min)                              |
| f             |  | 29.11% (2 min) | 50.13% (2 min)                              |

|          |                                                                                     |                 |                |
|----------|-------------------------------------------------------------------------------------|-----------------|----------------|
| <b>g</b> | 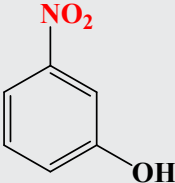   | 29.1% (5 min)   | 45.2% (5 min)  |
| <b>h</b> |    | 13.53% (5 min)  | 92.64% (5 min) |
| <b>i</b> |    | 23.65% (3 min)  | 83.91% (3 min) |
| <b>j</b> |   | 33.94% (2 min)  | 44.67% (2 min) |
| <b>k</b> |  | 25.09% (3 min)  | 94.31% (3 min) |
| <b>l</b> |  | 45.81% (2 min)  | 87.71% (2 min) |
| <b>m</b> | $\text{Cr}^{6+}$                                                                    | 93.94% (50 min) | 99.5% (50 min) |

**Table S5.** Relative element percentage of CdS/Ag<sub>25</sub>(SR)<sub>18</sub> heterostructure.

| <i>Elements</i> | <i>Wt (%)</i> |
|-----------------|---------------|
| C               | 30.13         |
| O               | 4.8           |
| Cd              | 50.59         |
| S               | 12.74         |
| Ag              | 1.73          |

## References

- [1] H. Liang, B. Liu, B. Tang, S. Zhu, S. Li, X. Ge, J. Li, J. Zhu, and F. Xiao, Atomically Precise Metal Nanocluster-Mediated Photocatalysis. *ACS Catal.* 12 (2022) 4216-4226.
- [2] M. Huang, Y. Li, T. Li, X. Dai, S. Hou, Y. He, G. Xiao, and F. Xiao, Self-transformation of Ultra-small Gold Nanoclusters to Gold Nanocrystals toward Boosted Photoreduction Catalysis. *Chemical communications (Cambridge, England)* 55 (2019) 1591-1594.
- [3] R.R. Nasaruddin, M.J. Hülsey, and J. Xie, Enhancing Catalytic Properties of Ligand-protected Gold-based 25-metal Atom Nanoclusters by Silver Doping. *Mol. Catal.* 518 (2022) 112095.
- [4] S. Joardar, M.L. Adams, R. Biswas, G.V. Deodhar, K.E. Metzger, K. Dewese, M. Davidson, R.M. Richards, B.G. Trewyn, and P. Biswas, Direct Synthesis of Silver Nanoparticles Modified Spherical Mesoporous Silica as Efficient Antibacterial Materials. *Microporous Mesoporous Mat.* 313 (2021) 110824.
- [5] W. Liu, X. Wang, H. Yu, and J. Yu, Direct Photoinduced Synthesis of Amorphous CoMoS<sub>x</sub> Cocatalyst and Its Improved Photocatalytic H<sub>2</sub> -Evolution Activity of CdS. *ACS Sustain. Chem. Eng.* 6 (2018) 12436-12445.
- [6] X. Fu, Y. Li, M. Huang, T. Li, X. Dai, S. Hou, Z. Wei, and F. Xiao, Partially Self-Transformed Transition-Metal Chalcogenide Interim Layer: Motivating Charge Transport Cascade for Solar Hydrogen Evolution. *Inorg. Chem.* 59 (2020) 2562-2574.
